# Supplementary material
Source: publisher site journal article supplement (https://www.kjim.org/upload/media/kjim-2025-101-Supplementary-Materials.pdf)
Supplement: Supplementary file 1 [file kjim-2025-101-Supplementary-Materials.pdf]

## SUPPLEMENTARY MATERIALS

### 유럽류마티스학회 건선 관절염 질환의 영향 (PsAID12) 설문지: 임상진료용

건선 관절염이 귀하의 건강에 얼마나 영향을 미치는지 표시해 주시기 바랍니다.

지난 한 주 동안의 상태에 대해 알려 주세요.

#### 1. 통증

지난 한 주 동안 건선 관절염으로 인하여 느낀 통증을 가장 잘 나타낸 숫자에 동그라미 치세요.

없음 

|   |   |   |   |   |   |   |   |   |    |
|---|---|---|---|---|---|---|---|---|----|
| 0 | 2 | 3 | 4 | 5 | 6 | 7 | 8 | 9 | 10 |
|---|---|---|---|---|---|---|---|---|----|

 매우 심함

설문 조사자  
작성란

결과  
×3

#### 2. 피로

지난 한 주 동안 건선 관절염으로 인해 경험한 피로의 전반적인 수준을 가장 잘 나타낸 숫자에 동그라미 치세요.

없음 

|   |   |   |   |   |   |   |   |   |    |
|---|---|---|---|---|---|---|---|---|----|
| 0 | 2 | 3 | 4 | 5 | 6 | 7 | 8 | 9 | 10 |
|---|---|---|---|---|---|---|---|---|----|

 매우 심함

결과  
×2

#### 3. 피부 문제

지난 한 주 동안 건선 관절염으로 인해 느낀 가려움증을 포함한 피부 문제를 가장 잘 나타낸 숫자에 동그라미 치세요.

없음 

|   |   |   |   |   |   |   |   |   |    |
|---|---|---|---|---|---|---|---|---|----|
| 0 | 2 | 3 | 4 | 5 | 6 | 7 | 8 | 9 | 10 |
|---|---|---|---|---|---|---|---|---|----|

 매우 심함

결과  
×2

#### 4. 일상 업무 및/또는 여가 활동

지난 한 주 동안 건선 관절염으로 인해 업무 및/또는 여가 활동을 수행하는데 겪은 어려움을 가장 잘 나타낸 숫자에 동그라미 치세요.

없음 

|   |   |   |   |   |   |   |   |   |    |
|---|---|---|---|---|---|---|---|---|----|
| 0 | 2 | 3 | 4 | 5 | 6 | 7 | 8 | 9 | 10 |
|---|---|---|---|---|---|---|---|---|----|

 매우 어려움

결과  
×2

#### 5. 일상 기능

지난 한 주 동안 건선 관절염으로 인해 일상적인 신체 활동에서 겪은 어려움을 가장 잘 나타낸 숫자에 동그라미 치세요.

없음 

|   |   |   |   |   |   |   |   |   |    |
|---|---|---|---|---|---|---|---|---|----|
| 0 | 2 | 3 | 4 | 5 | 6 | 7 | 8 | 9 | 10 |
|---|---|---|---|---|---|---|---|---|----|

 매우 어려움

결과  
×2

#### 6. 불편함

지난 한 주 동안 건선 관절염으로 인해 일상적인 활동에서 느낀 불편함과 짜증을 가장 잘 나타낸 숫자에 동그라미 치세요.

없음 

|   |   |   |   |   |   |   |   |   |    |
|---|---|---|---|---|---|---|---|---|----|
| 0 | 2 | 3 | 4 | 5 | 6 | 7 | 8 | 9 | 10 |
|---|---|---|---|---|---|---|---|---|----|

 매우 어려움

결과  
×2

#### 7. 수면 장애

지난 한 주 동안 건선 관절염으로 인한 수면(혹은 저녁에 휴식 취할때) 문제를 가장 잘 나타낸 숫자에 동그라미 치세요.

없음 

|   |   |   |   |   |   |   |   |   |    |
|---|---|---|---|---|---|---|---|---|----|
| 0 | 2 | 3 | 4 | 5 | 6 | 7 | 8 | 9 | 10 |
|---|---|---|---|---|---|---|---|---|----|

 매우 어려움

결과  
×2

8. 대처 능력

건선 관절염의 전반적인 상태를 고려할 때, 지난 한 주 동안 건선 관절염에 얼마나 잘 대처(관리, 대응, 견디기) 하셨습니다?

매우 잘함 

|   |   |   |   |   |   |   |   |   |    |
|---|---|---|---|---|---|---|---|---|----|
| 0 | 2 | 3 | 4 | 5 | 6 | 7 | 8 | 9 | 10 |
|---|---|---|---|---|---|---|---|---|----|

 매우 부족함

설문 조사자  
작성란

결과  
×1

9. 불안, 두려움과 미심쩍음

지난 한 주 동안 건선 관절염으로 인해 경험한 불안, 두려움, 미심쩍음 정도(예를 들어 미래 상황, 치료 방법, 외로움에 대한 두려움)를 가장 잘 나타낸 숫자에 동그라미 치세요.

없음 

|   |   |   |   |   |   |   |   |   |    |
|---|---|---|---|---|---|---|---|---|----|
| 0 | 2 | 3 | 4 | 5 | 6 | 7 | 8 | 9 | 10 |
|---|---|---|---|---|---|---|---|---|----|

 매우 심함

결과  
×1

10. 당혹감 및/또는 창피함

건선 관절염의 전반적인 상태를 고려할 때, 지난 한 주 동안 외모로 인해 경험한 당혹감 및/또는 창피함 정도를 가장 잘 나타낸 숫자에 동그라미 치세요.

없음 

|   |   |   |   |   |   |   |   |   |    |
|---|---|---|---|---|---|---|---|---|----|
| 0 | 2 | 3 | 4 | 5 | 6 | 7 | 8 | 9 | 10 |
|---|---|---|---|---|---|---|---|---|----|

 매우 심함

결과  
×1

11. 사회 활동

지난 한 주 동안 건선 관절염으로 인해 사회 활동(가족 및/또는 가까운 지인과의 관계 포함)에 참여하는 데 겪은 어려움을 가장 잘 나타낸 숫자에 동그라미 치세요.

없음 

|   |   |   |   |   |   |   |   |   |    |
|---|---|---|---|---|---|---|---|---|----|
| 0 | 2 | 3 | 4 | 5 | 6 | 7 | 8 | 9 | 10 |
|---|---|---|---|---|---|---|---|---|----|

 매우 어려움

결과  
×1

12. 우울감

지난 한 주 동안 건선 관절염으로 인한 우울감 정도를 가장 잘 나타낸 숫자에 동그라미 치세요.

없음 

|   |   |   |   |   |   |   |   |   |    |
|---|---|---|---|---|---|---|---|---|----|
| 0 | 2 | 3 | 4 | 5 | 6 | 7 | 8 | 9 | 10 |
|---|---|---|---|---|---|---|---|---|----|

 매우 심함

결과  
×1

설문에 답변해 주셔서 감사합니다

20점 기준  
최종 PsAID 점수

를 합산 후,  
20으로 나누세요:

## PsAID 채점 및 계산 규칙

PsAID는 12개의 수치 평가 척도(NRS) 질문을 기반으로 계산됩니다.  
각 NRS는 0에서 10 사이의 숫자로 평가 됩니다.

### 계산

PsAID 최종 값 =  
 + (PsAID1 (통증) NRS 값 (범위 0-10) x 3)  
 + (PsAID2 (피로) NRS 값 (범위 0-10) x 2)  
 + (PsAID3 (피부) NRS 값 (범위 0-10) x 2)  
 + (PsAID4 (업무 및/혹는 여가활동) NRS 값 (범위 0-10) x 2)  
 + (PsAID5 (기능) NRS 값 (범위 0-10) x 2)  
 + (PsAID6 (불편함) NRS 값 (범위 0-10) x 2)  
 + (PsAID7 (수면) NRS 값 (범위 0-10) x 2)  
 + (PsAID8 (대처) NRS 값 (범위 0-10) x 1)  
 + (PsAID9 (불안) NRS 값 (범위 0-10) x 1)  
 + (PsAID10 (당혹감) NRS 값 (범위 0-10) x 1)  
 + (PsAID11 (사회 생활) NRS 값 (범위 0-10) x 1)  
 + (PsAID12 (우울함) NRS 값 (범위 0-10) x 1)

총합을 20으로 나눕니다.

따라서 PsAID 최종 값 범위는 0-10이며, 수치가 높을수록 나쁜 상태임을 의미합니다.

### 결측 데이터 대체

PsAID를 구성하는 12개의 NRS 값 중 하나가 결측된 경우, 다음과 같은 방법으로 대체합니다:

나머지 11개의 (결측되지 않은) NRS 평균값을 계산하여(범위, 0-10) 이 값을 결측된 NRS 값으로 입력합니다.

그 후, 위에서 설명한 대로 PsAID를 계산합니다.

만약 2개 이상의 NRS 값이 결측된 경우, PsAID는 결측값으로 간주됩니다(대체하지 않음).
